# Supplementary material for: Circular RNA RSU1 promotes retinal vascular dysfunction by regulating miR-345-3p/TAZ
Source: PubMed Central journal article supplement (PMC10344963; doi:10.1038/s42003-023-05064-x), 2023-07-13

## Supplementary Tables

**Supplementary Table 1. Primers used for qRT-PCR**

| Genes                  | Forward (5'-3')        | Reverse (5'-3')         |
|------------------------|------------------------|-------------------------|
| circRSU1               | TCGCTGCCTAAGGAAATCGG   | ATGGCTGAGGACCAGTTGTG    |
| miR-345-3p             | TGGTTATTAGCCCTGAACGAG  | AGTGCGTGTTCGTGGAGTCG    |
| TAZ                    | TGCTACAGTGTCCCCACAAC   | GAAACGGGTCTGTTGGGGAT    |
| VEGF                   | GGCAGAATCATCACGAAGT    | TGGTGATGTTGGACTCCTCA    |
| $\beta$ -actin         | GAGAAAATCTGGCACCACACC  | GGATAGCACAGCCTGGATAGCAA |
| U6                     | CTCGCTTCGGCAGCACA      | AACGCTTCACGAATTTGCGT    |
| circRSU1<br>Convergent | GAGCTTACCCAGCTTAAAGAGC | GGCACCATTGTTAGCTTGTATG  |
| circRSU1<br>Divergent  | CATGAACAGGCTGAACACTTTG | TCAGGTAGAAGAAGTTTCCAGG  |
| GAPDH<br>Convergent    | ATGGCCTCCAAGGAGTAAATG  | AGGTCAATGAAGGGGTCATTG   |
| GAPDH<br>Divergent     | AGAAGGCTGGGGCTCATTG    | GCAGGAGGCATTGCTGATGAT   |

## Supplementary Figures

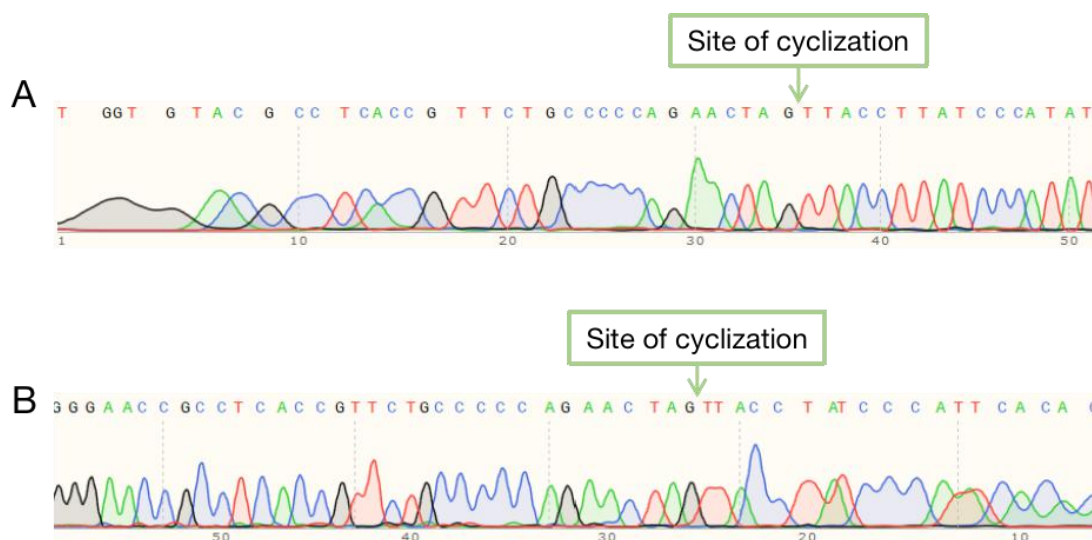

**Supplementary Figure 1. DNA sequencing results of circRSU1.**

The cyclization site sequence of circR in circBase is GCCCCAGAACTAGTTACCTTATCCCAT.

## Supplementary Figure 2. Unedited/uncropped Western blot gels

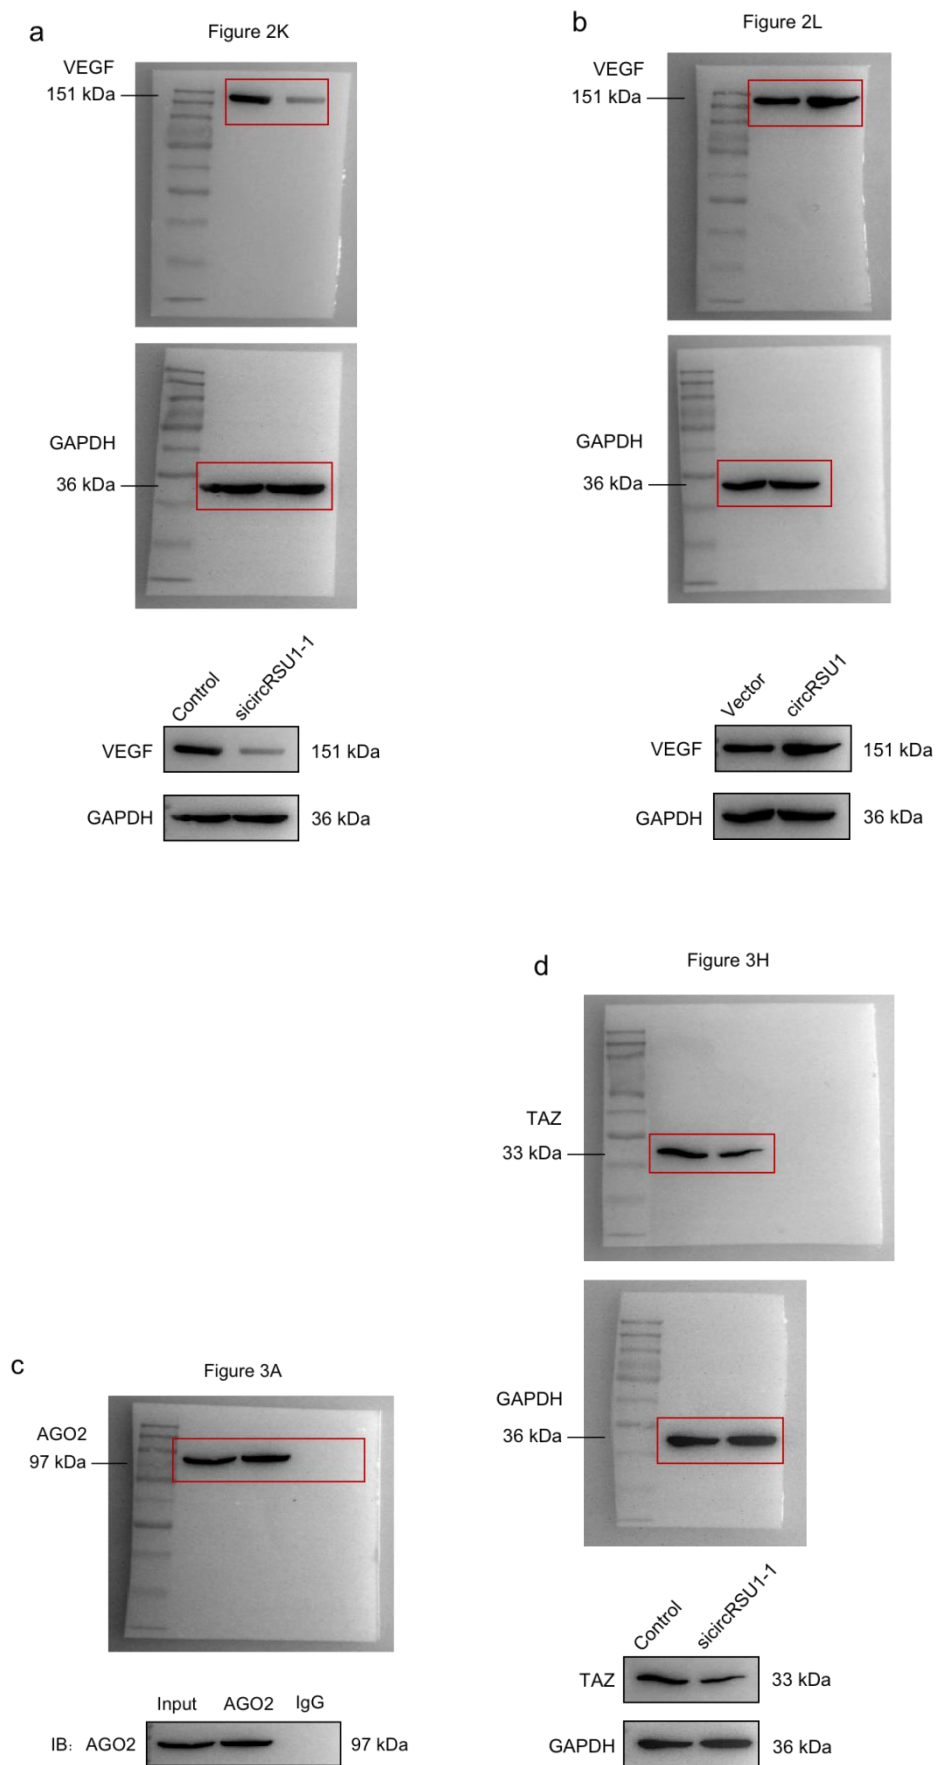

e Figure 3I

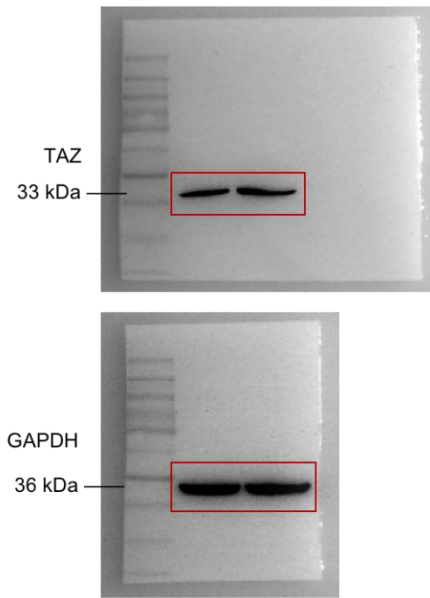

f Figure 3J

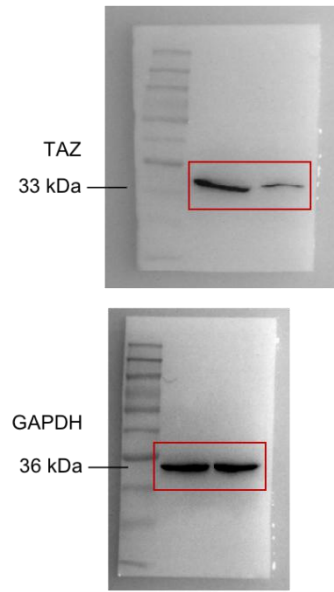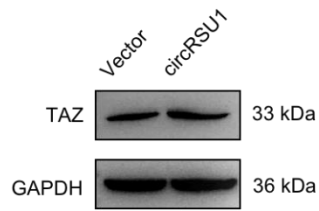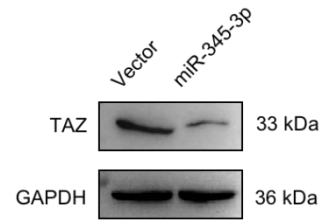

g Figure 4G

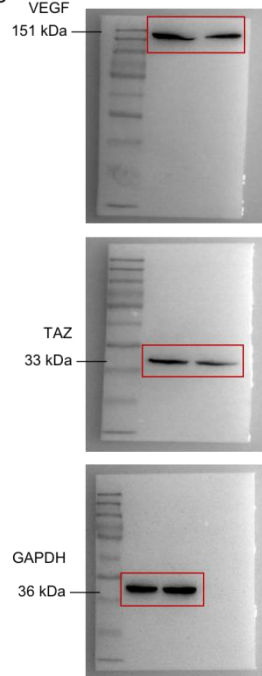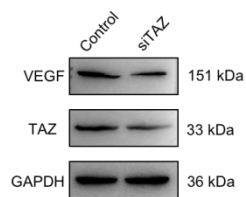

h Figure 5F

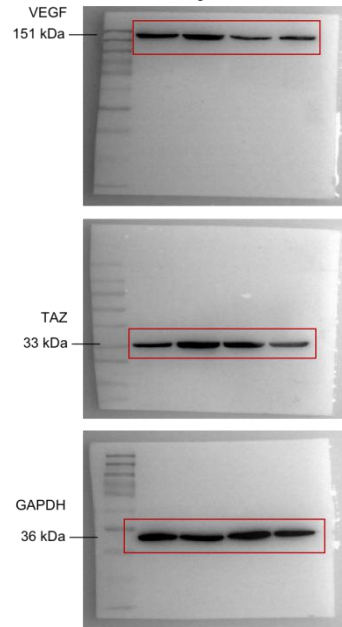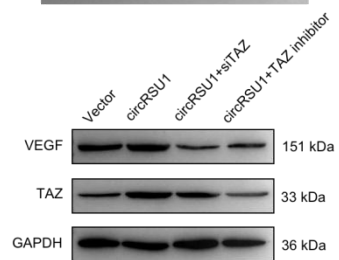

Supplement: 42003_2023_5064_MOESM1_ESM.pdf [file 42003_2023_5064_MOESM1_ESM.pdf]
