# Supplementary material for: Circular RNA RSU1 promotes retinal vascular dysfunction by regulating miR-345-3p/TAZ
Source: PubMed Central journal article supplement (PMC10344963; doi:10.1038/s42003-023-05064-x), 2023-07-13
Supplement: 42003_2023_5064_MOESM2_ESM.pdf [file 42003_2023_5064_MOESM2_ESM.pdf]

## Description of Additional Supplementary Files

**File name:** Supplementary Data

**Description:** The source data underlying Figs. 1b-e, 2a-b, 2d-m, 3a-b, 3e, 3g-j, 4a-g, 5a, 5c-f, and 6a-d.
