# Supplementary material for: Circular RNA RSU1 promotes retinal vascular dysfunction by regulating miR-345-3p/TAZ
Source: PubMed Central journal article supplement (PMC10344963; doi:10.1038/s42003-023-05064-x), 2023-07-13
Supplement: 42003_2023_5064_MOESM4_ESM.pdf [file 42003_2023_5064_MOESM4_ESM.pdf]

## Reporting Summary

Nature Portfolio wishes to improve the reproducibility of the work that we publish. This form provides structure for consistency and transparency in reporting. For further information on Nature Portfolio policies, see our [Editorial Policies](#) and the [Editorial Policy Checklist](#).

### Statistics

For all statistical analyses, confirm that the following items are present in the figure legend, table legend, main text, or Methods section.

- | n/a                                 | Confirmed                                                                                                                                                                                                                                                                                      |
|-------------------------------------|------------------------------------------------------------------------------------------------------------------------------------------------------------------------------------------------------------------------------------------------------------------------------------------------|
| <input type="checkbox"/>            | <input checked="" type="checkbox"/> The exact sample size ( $n$ ) for each experimental group/condition, given as a discrete number and unit of measurement                                                                                                                                    |
| <input type="checkbox"/>            | <input checked="" type="checkbox"/> A statement on whether measurements were taken from distinct samples or whether the same sample was measured repeatedly                                                                                                                                    |
| <input type="checkbox"/>            | <input checked="" type="checkbox"/> The statistical test(s) used AND whether they are one- or two-sided<br><i>Only common tests should be described solely by name; describe more complex techniques in the Methods section.</i>                                                               |
| <input type="checkbox"/>            | <input checked="" type="checkbox"/> A description of all covariates tested                                                                                                                                                                                                                     |
| <input checked="" type="checkbox"/> | <input type="checkbox"/> A description of any assumptions or corrections, such as tests of normality and adjustment for multiple comparisons                                                                                                                                                   |
| <input type="checkbox"/>            | <input checked="" type="checkbox"/> A full description of the statistical parameters including central tendency (e.g. means) or other basic estimates (e.g. regression coefficient) AND variation (e.g. standard deviation) or associated estimates of uncertainty (e.g. confidence intervals) |
| <input type="checkbox"/>            | <input checked="" type="checkbox"/> For null hypothesis testing, the test statistic (e.g. $F$ , $t$ , $r$ ) with confidence intervals, effect sizes, degrees of freedom and $P$ value noted<br><i>Give <math>P</math> values as exact values whenever suitable.</i>                            |
| <input checked="" type="checkbox"/> | <input type="checkbox"/> For Bayesian analysis, information on the choice of priors and Markov chain Monte Carlo settings                                                                                                                                                                      |
| <input type="checkbox"/>            | <input checked="" type="checkbox"/> For hierarchical and complex designs, identification of the appropriate level for tests and full reporting of outcomes                                                                                                                                     |
| <input checked="" type="checkbox"/> | <input type="checkbox"/> Estimates of effect sizes (e.g. Cohen's $d$ , Pearson's $r$ ), indicating how they were calculated                                                                                                                                                                    |

*Our web collection on [statistics for biologists](#) contains articles on many of the points above.*

### Software and code

Policy information about [availability of computer code](#)

Data collection

Data analysis

For manuscripts utilizing custom algorithms or software that are central to the research but not yet described in published literature, software must be made available to editors and reviewers. We strongly encourage code deposition in a community repository (e.g. GitHub). See the Nature Portfolio [guidelines for submitting code & software](#) for further information.

### Data

Policy information about [availability of data](#)

All manuscripts must include a [data availability statement](#). This statement should provide the following information, where applicable:

- Accession codes, unique identifiers, or web links for publicly available datasets
- A description of any restrictions on data availability
- For clinical datasets or third party data, please ensure that the statement adheres to our [policy](#)

## Human research participants

Policy information about [studies involving human research participants and Sex and Gender in Research](#).

|                             |                                                                                                                                                                                                                                                                                                                                                                                                                                                                                                                                  |
|-----------------------------|----------------------------------------------------------------------------------------------------------------------------------------------------------------------------------------------------------------------------------------------------------------------------------------------------------------------------------------------------------------------------------------------------------------------------------------------------------------------------------------------------------------------------------|
| Reporting on sex and gender | Demographic data of all patients included sex and gender were analyzed. Among these patients, the ratio of Male/Female was 26/27 in DM group and 23/27 in DR group.                                                                                                                                                                                                                                                                                                                                                              |
| Population characteristics  | A total of 103 patients with type 2 diabetes mellitus were recruited.                                                                                                                                                                                                                                                                                                                                                                                                                                                            |
| Recruitment                 | A cohort of 103 patients with type 2 diabetes were recruited from the First Affiliated Hospital of Chongqing Medical University, between March 2019 and March 2020, according to the guidelines described by the American Diabetes Association. All patients underwent a complete ophthalmological examination, including corrected slit-lamp microscopic examination fundoscopic examination, and fluorescence angiography. Patients with a history of rheumatic disease and inflammatory disease were excluded from the study. |
| Ethics oversight            | the Ethics Committee of the First Affiliated Hospital of Chongqing Medical University                                                                                                                                                                                                                                                                                                                                                                                                                                            |

Note that full information on the approval of the study protocol must also be provided in the manuscript.

## Field-specific reporting

Please select the one below that is the best fit for your research. If you are not sure, read the appropriate sections before making your selection.

Life sciences       Behavioural & social sciences       Ecological, evolutionary & environmental sciences

For a reference copy of the document with all sections, see [nature.com/documents/nr-reporting-summary-flat.pdf](https://www.nature.com/documents/nr-reporting-summary-flat.pdf)

## Life sciences study design

All studies must disclose on these points even when the disclosure is negative.

|                 |                                                                                                                                                                                                                                                                                                    |
|-----------------|----------------------------------------------------------------------------------------------------------------------------------------------------------------------------------------------------------------------------------------------------------------------------------------------------|
| Sample size     | A total of 103 patients with type 2 diabetes mellitus. The Male Sprague-Dawley rats (80-100g) were used as a type 2 DM animal model. Intravitreal injection of sicircRSU1-1 (n = 18 eyes), scramble siRNA (n = 18 eyes) and miR-345-3p antagomir (n = 18 eyes) were performed in vivo experiments. |
| Data exclusions | No data were excluded from the analyses.                                                                                                                                                                                                                                                           |
| Replication     | All of the data were obtained from three independent experiments.                                                                                                                                                                                                                                  |
| Randomization   | Participants were divided into two groups depending on the diagnosis. Animals were randomly averagely divided into different groups.                                                                                                                                                               |
| Blinding        | The investigators were blinded to group allocation during data collection.                                                                                                                                                                                                                         |

## Reporting for specific materials, systems and methods

We require information from authors about some types of materials, experimental systems and methods used in many studies. Here, indicate whether each material, system or method listed is relevant to your study. If you are not sure if a list item applies to your research, read the appropriate section before selecting a response.

### Materials & experimental systems

| n/a                                 | Involved in the study                                           |
|-------------------------------------|-----------------------------------------------------------------|
| <input type="checkbox"/>            | <input checked="" type="checkbox"/> Antibodies                  |
| <input type="checkbox"/>            | <input checked="" type="checkbox"/> Eukaryotic cell lines       |
| <input checked="" type="checkbox"/> | <input type="checkbox"/> Palaeontology and archaeology          |
| <input type="checkbox"/>            | <input checked="" type="checkbox"/> Animals and other organisms |
| <input type="checkbox"/>            | <input checked="" type="checkbox"/> Clinical data               |
| <input checked="" type="checkbox"/> | <input type="checkbox"/> Dual use research of concern           |

### Methods

| n/a                                 | Involved in the study                           |
|-------------------------------------|-------------------------------------------------|
| <input checked="" type="checkbox"/> | <input type="checkbox"/> ChIP-seq               |
| <input checked="" type="checkbox"/> | <input type="checkbox"/> Flow cytometry         |
| <input checked="" type="checkbox"/> | <input type="checkbox"/> MRI-based neuroimaging |

## Antibodies

|                 |                                                                                                                                                                                                 |
|-----------------|-------------------------------------------------------------------------------------------------------------------------------------------------------------------------------------------------|
| Antibodies used | 1. VEGF receptor 1 (ab32152, Abcam), 2. GAPDH (M00227-5, BOSTER), 3. TAZ (ab224239, Abcam), 4. Ago2 (ab186733, Abcam)<br>5. secondary antibody: rabbit anti-rat IgG antibody (ab102248, Abcam). |
| Validation      | Western blot (Beyotime).                                                                                                                                                                        |

## Eukaryotic cell lines

Policy information about [cell lines and Sex and Gender in Research](#)

|                                                                      |                                                                                                                |
|----------------------------------------------------------------------|----------------------------------------------------------------------------------------------------------------|
| Cell line source(s)                                                  | The primary human retinal vascular endothelial cells (HRVECs) were purchased from Cell Systems (Kirkland, WA). |
| Authentication                                                       | VIII factor related antigen-antibody DAB staining.                                                             |
| Mycoplasma contamination                                             | All cell lines tested negative for mycoplasma contamination.                                                   |
| Commonly misidentified lines<br>(See <a href="#">ICLAC</a> register) | HRVECs for vitro experiments.                                                                                  |

## Animals and other research organisms

Policy information about [studies involving animals](#); [ARRIVE guidelines](#) recommended for reporting animal research, and [Sex and Gender in Research](#)

|                         |                                                                                                          |
|-------------------------|----------------------------------------------------------------------------------------------------------|
| Laboratory animals      | Male Sprague-Dawley rats (80-100g) were obtained from SLAC Laboratory Animal Co., Ltd (Shanghai, China). |
| Wild animals            | The study did not involve wild animals.                                                                  |
| Reporting on sex        | Male rats were obtained for the study.                                                                   |
| Field-collected samples | All the animals were kept on a 12-h light/dark cycle.                                                    |
| Ethics oversight        | the Animal Ethics Committee of the First Affiliated Hospital of Chongqing Medical University             |

Note that full information on the approval of the study protocol must also be provided in the manuscript.

## Clinical data

Policy information about [clinical studies](#)

All manuscripts should comply with the ICMJE [guidelines for publication of clinical research](#) and a completed [CONSORT checklist](#) must be included with all submissions.

|                             |                                                                                                                                                                                                                                                                                                                                               |
|-----------------------------|-----------------------------------------------------------------------------------------------------------------------------------------------------------------------------------------------------------------------------------------------------------------------------------------------------------------------------------------------|
| Clinical trial registration | 81900887 from the Ethics Committee of the First Affiliated Hospital of Chongqing Medical University                                                                                                                                                                                                                                           |
| Study protocol              | The plasma samples of all patients were gathered from blood, which was classified into diabetes mellitus participants without DR (n=53) and DR group (n=50). Medical files of all patients were reviewed by trained certified doctors to collect relevant medical information. CircRNAs and serum levels of VEGF were measured in this study. |
| Data collection             | A cohort of 103 patients with type 2 diabetes were recruited from the First Affiliated Hospital of Chongqing Medical University, between March 2019 and March 2020. Demographic data of all patients included gender, age, body mass index, diabetes duration, family history, fasting glucose, HbA1c, circRSU1 and VEGF.                     |
| Outcomes                    | Main outcome: circRSU1 and VEGF. Secondary outcome: gender, age, body mass index, diabetes duration, family history, fasting glucose and HbA1c.                                                                                                                                                                                               |
